# Supplementary material
Source: publisher figshare collection journal article supplement (https://karger.figshare.com/articles/dataset/_/5125189)
Supplement: Supplementary file 1 [file 1]

Archive with 3 entries (3 files):
- 000351608_sm_Figure.doc
- 000351608_sm_Suppl_Material.pdf
- 000351608_sm_Video.mp4
